# Supplementary material for: Prognostic value of circulating proteins at diagnosis among patients with lung cancer: a comprehensive analysis by smoking status
Source: PubMed Central journal article supplement — Transl Lung Cancer Res. 2024 Sep 27;13(9):2326–39. doi: 10.21037/tlcr-24-242 (PMC11484726; doi:10.21037/tlcr-24-242), 2024-09-27
Supplement: tlcr-13-09-2326-dss.pdf [file tlcr-13-09-2326-dss.pdf]

## Data Sharing Statement

|                     |                                                                                                                                                     |                                                                                                                                                                                                    |
|---------------------|-----------------------------------------------------------------------------------------------------------------------------------------------------|----------------------------------------------------------------------------------------------------------------------------------------------------------------------------------------------------|
| <b>Article Info</b> | <a href="https://dx.doi.org/10.21037/tlcr-24-242">https://dx.doi.org/10.21037/tlcr-24-242</a>                                                       |                                                                                                                                                                                                    |
| <b>Item</b>         | <b>Question</b>                                                                                                                                     | <b>Authors' Response<br/>(place "-" if not applicable)</b>                                                                                                                                         |
| 1                   | Would you like to share data collected for your study to others?                                                                                    | No.                                                                                                                                                                                                |
| 2                   | If not, would you like to share the reason for your decision?                                                                                       | Due to legal restrictions, individual-level data from this study cannot be shared with a third party.                                                                                              |
| 3                   | What data in particular will be shared?                                                                                                             | -                                                                                                                                                                                                  |
| 4                   | Any other documents will be shared? Such as study protocol, statistical analysis plan, informed consent form, clinical study report, analytic code. | Study protocol, statistical analysis plan, informed consent form, and analytic code can be available upon request to the corresponding authors.                                                    |
| 5                   | When will data availability begin?                                                                                                                  | From the publication date.                                                                                                                                                                         |
| 6                   | When will data availability end?                                                                                                                    | No specific restriction.                                                                                                                                                                           |
| 7                   | To whom will you share the data?                                                                                                                    | Researchers who are interested in this study.                                                                                                                                                      |
| 8                   | For what type of analysis or purpose?                                                                                                               | Identifying biomarkers for the risk of cancer mortality or predicting cancer survival using biomarker-based models.                                                                                |
| 9                   | How or where can the data/documents be obtained?                                                                                                    | Upon request by contacting Dr Mahdi Sheikh at <a href="mailto:sheikhm@iarc.who.int">sheikhm@iarc.who.int</a> or Dr Xiaoshuang Feng at <a href="mailto:fengx@iarc.who.int">fengx@iarc.who.int</a> . |
| 10                  | Any other restrictions?                                                                                                                             | We may balance the potential benefits and risks for each request and then provide the documents that could be shared.                                                                              |
